# Supplementary material
Source: publisher figshare collection journal article supplement (https://springernature.figshare.com/ndownloader/files/18043466)
Supplement: Supplementary file [file 18043466]

Appendix Table A2. Spatial scale of a sample of incidence studies. For 50% of abstracts (619 randomly selected among the total 1,237), we carried out full-text eligibility assessment for the 20 abstracts relating spatial risk factors to disease incidence. We determined the spatial scale of analysis for each study.

| citation                                                                                                                                                                                                                                                                                                   | spatial scale for incidence data                                     |
|------------------------------------------------------------------------------------------------------------------------------------------------------------------------------------------------------------------------------------------------------------------------------------------------------------|----------------------------------------------------------------------|
| L.E. Jackson, E.D. Hilborn, J.C. Thomas, Towards landscape design guidelines for reducing Lyme disease risk, <i>Int. J. Epidemiol.</i> 35 (2006) 315–322. doi:10.1093/ije/dyi284.                                                                                                                          | areas bounded by federally funded roads, 0.02 to 580 km <sup>2</sup> |
| E.K. Cromley, M.L. Cartter, R.D. Mrozinski, S.-H. Ertel, Residential Setting as a Risk Factor for Lyme Disease in a Hyperendemic Region, <i>Am. J. Epidemiol.</i> 147 (1998) 472–477.                                                                                                                      | inside vs. outside village                                           |
| Nicholson, T. & Mather, M. (1996) Methods for evaluating Lyme disease risks using geographic information systems and geospatial analysis. <i>Journal of Medical Entomology</i> , 33, 711–719.                                                                                                              | 10 km <sup>2</sup> quadrat                                           |
| R.C. Falco, D.F. McKenna, T.J. Daniels, R.B. Nadelman, J. Nowakowski, D. Fish, G.P. Wormser, Temporal Relation between <i>Ixodes scapularis</i> Abundance and Risk for Lyme Disease Associated with Erythema Migrans, <i>Am. J. Epidemiol.</i> 149 (1999) 771–776. doi:10.1093/oxfordjournals.aje.a009886. | county                                                               |
| Greene SK, Levin-Rector A, Hadler JL, Fine AD. Disparities in Reportable Communicable Disease Incidence by Census Tract-Level Poverty, New York City, 2006-2013. <i>Am J Public Health.</i> 2015; 105(9):E27–E34.                                                                                          | census tract                                                         |
| Kilpatrick HJ, Labonte AM, Stafford III KC. The Relationship Between Deer Density, Tick Abundance, and Human Cases of Lyme Disease in a Residential Community. <i>J Med Entomol.</i> 2014; 51(4):777–784.                                                                                                  | community                                                            |
| Seukep SE, Kolivras KN, Hong Y, et al. An Examination of the Demographic and Environmental Variables Correlated with Lyme Disease Emergence in Virginia. <i>Ecohealth.</i> 2015; 12(4):634–644.                                                                                                            | census tract                                                         |
| Walsh MG. The Relevance of Forest Fragmentation on the Incidence of Human Babesiosis: Investigating the Landscape Epidemiology of an Emerging Tick-Borne Disease. <i>Vector-borne zoonotic Dis.</i> 2013; 13(4):250–255.                                                                                   | county                                                               |
| Dahlgren FS, Mandel EJ, Krebs JW, Massung RF, McQuiston JH. Increasing Incidence of <i>Ehrlichia chaffeensis</i> and <i>Anaplasma phagocytophilum</i> in the United States, 2000-2007. <i>Am J Trop Med Hyg.</i> 2011; 85(1):124–131.                                                                      | state                                                                |
| Wiznia D, Christos P, LaBonte A. The Use of Deer Vehicle Accidents as a Proxy for Measuring the Degree of Interaction Between Human and Deer Populations and Its Correlation With the Incidence Rate of Lyme Disease. <i>J Environ Health.</i> 2014; 75(8):32–39.                                          | town; deer management zone                                           |
| Levi T, Kilpatrick AM, Mangel M, Wilmers CC. Deer, predators, and the emergence of Lyme disease. <i>Proc Natl Acad Sci U S A.</i> 2012; 109(27):10942–10947.                                                                                                                                               | county                                                               |

Appendix Table A2. Spatial scale of a sample of incidence studies. For 50% of abstracts (619 randomly selected among the total 1,237), we carried out full-text eligibility assessment for the 20 abstracts relating spatial risk factors to disease incidence. We determined the spatial scale of analysis for each study.

| citation                                                                                                                                                                                                                                              | spatial scale for incidence data                    |
|-------------------------------------------------------------------------------------------------------------------------------------------------------------------------------------------------------------------------------------------------------|-----------------------------------------------------|
| Garnett MJM, Connally NNP, Stafford K, Cartter MML, Stafford III KC, Cartter MML. Student Column: Evaluation of deer-targeted interventions on Lyme disease incidence in Connecticut. <i>Public Health Rep.</i> 2011; 126(3):446–454.                 | town; county                                        |
| Hilborn ED, Catanzaro DG, Jackson LE. Repeated holdout cross-validation of model to estimate risk of Lyme disease by landscape characteristics. <i>Int J Environ Health Res.</i> 2012; 22(1):1–11.                                                    | federally funded roads, 0.02 to 580 km <sup>2</sup> |
| Schauber EM, Ostfeld RS, Evans AS. What is the best predictor of annual Lyme disease incidence: Weather, mice, or acorns? <i>Ecol Appl.</i> 2005; 15(2): 575–586.                                                                                     | state                                               |
| Chaput EK, Meek JI, Heimer R. Spatial analysis of human granulocytic ehrlichiosis near Lyme, Connecticut. <i>Emerg Infect Dis.</i> 2002; 8(9):943–948.                                                                                                | census block group                                  |
| Naleway, A. L., et al. (2002). "Lyme disease incidence in Wisconsin: A comparison of state-reported rates and rates from a population-based cohort." <i>AMERICAN JOURNAL OF EPIDEMIOLOGY</i> 155(12): 1120-1127.                                      | town, county                                        |
| Frank Mapping Lyme disease incidence for diagnostic and preventive decisions, Maryland                                                                                                                                                                | zip code                                            |
| Stafford, K. C., et al. (1998). "Temporal correlations between tick abundance and prevalence of ticks infected with <i>Borrelia burgdorferi</i> and increasing incidence of Lyme disease." <i>JOURNAL OF CLINICAL MICROBIOLOGY</i> 36 (5): 1240-1244. | town                                                |
| Kitron, U. and J. J. Kazmierczak (1997). "Spatial analysis of the distribution of Lyme disease in Wisconsin." <i>AMERICAN JOURNAL OF EPIDEMIOLOGY</i> 145(6): 558-566.                                                                                | county                                              |
